# Supplementary material
Source: publisher site journal article supplement (https://www.dovepress.com/article/supplementary_file/602582/602582%20Supplemental%20File.docx)
Supplement: Supplementary file 1 [file 602582%20Supplemental%20File.docx]

**Supplemental Figure 1. Study design**

*Description: Schema illustrating key elements and timing of the study design*


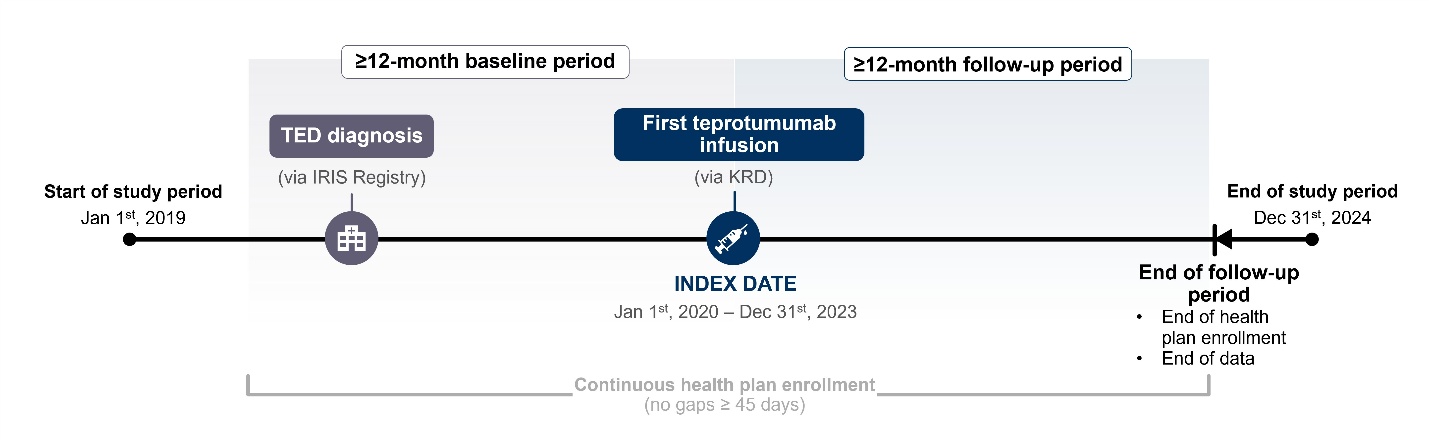


IRIS, Intelligent Research in Sight; KRD, Komodo Research Dataset; TED, thyroid eye disease.

**Supplemental Figure 2. Study patient population**

*Description: Flowchart illustrating the selection criteria used to identify the eligible study population, including subgroups of interest*


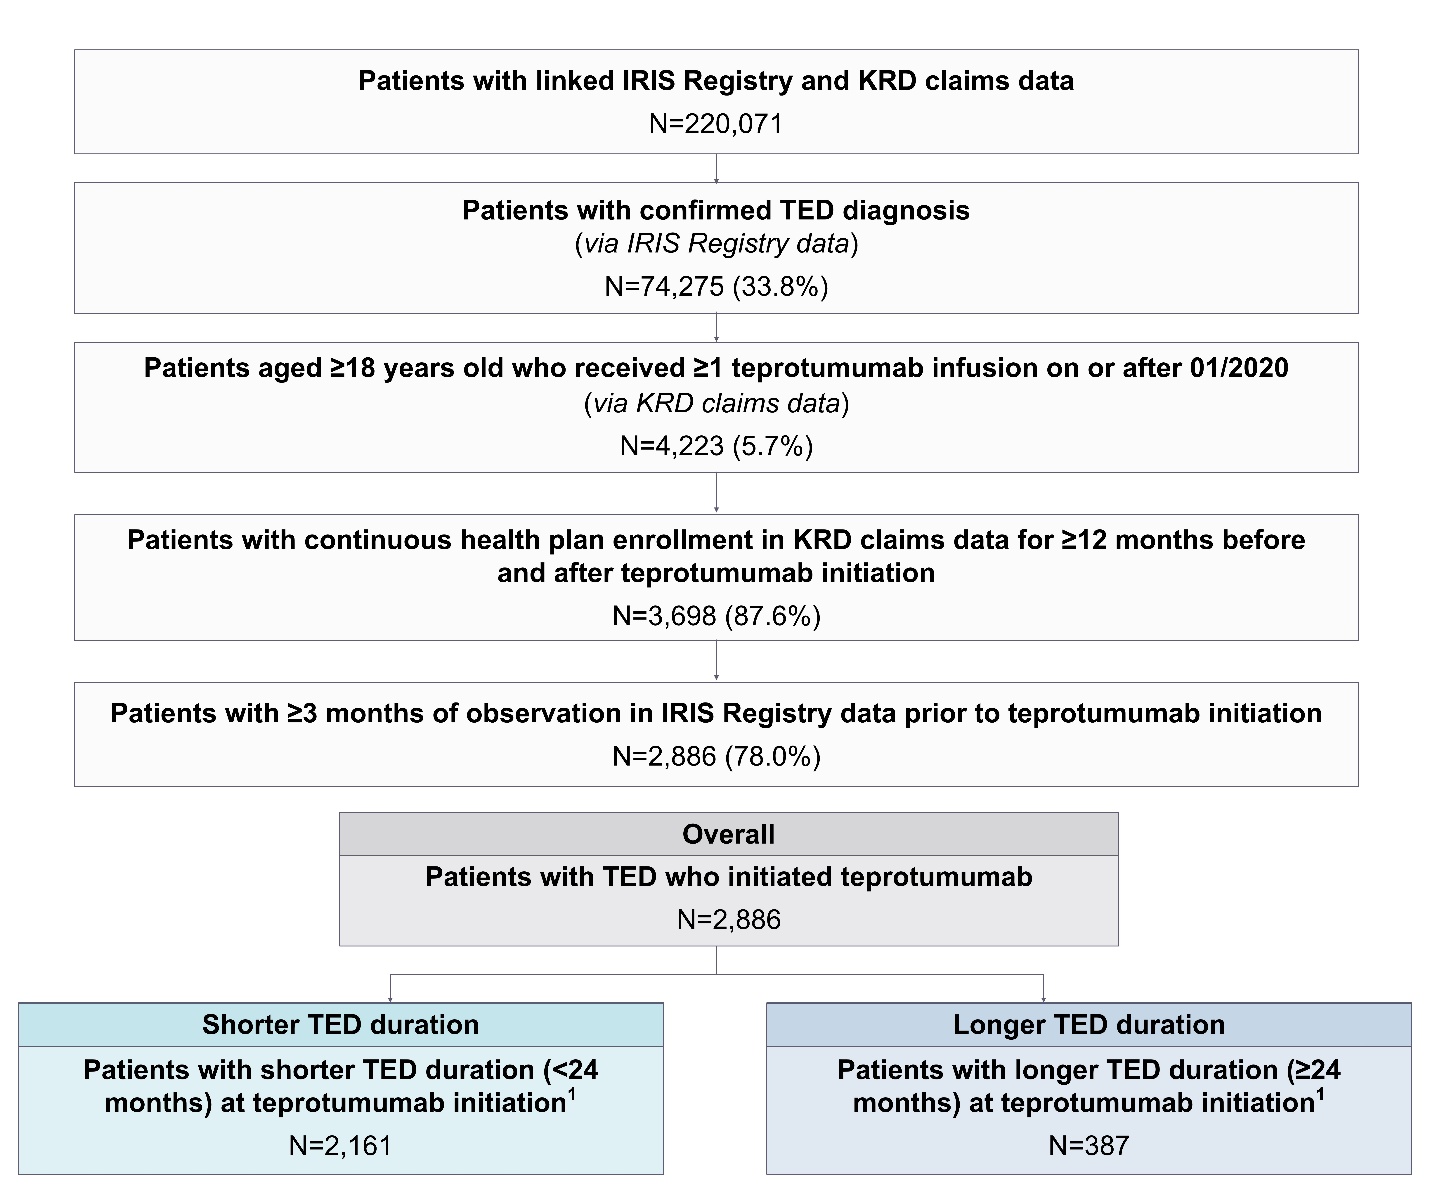


1Some patients (N=338) could not be categorized into subgroups due to unknown TED duration at the index date and consequently were excluded from subgroup analyses.

IRIS, Intelligent Research in Sight; KRD, Komodo Research Dataset; TED, thyroid eye disease.

**Supplemental Figure 3. Teprotumumab infusion patterns by TED duration**

*Description: Flowchart depicting infusion patterns across the first and second courses of teprotumumab treatment among subgroups of interest*

*
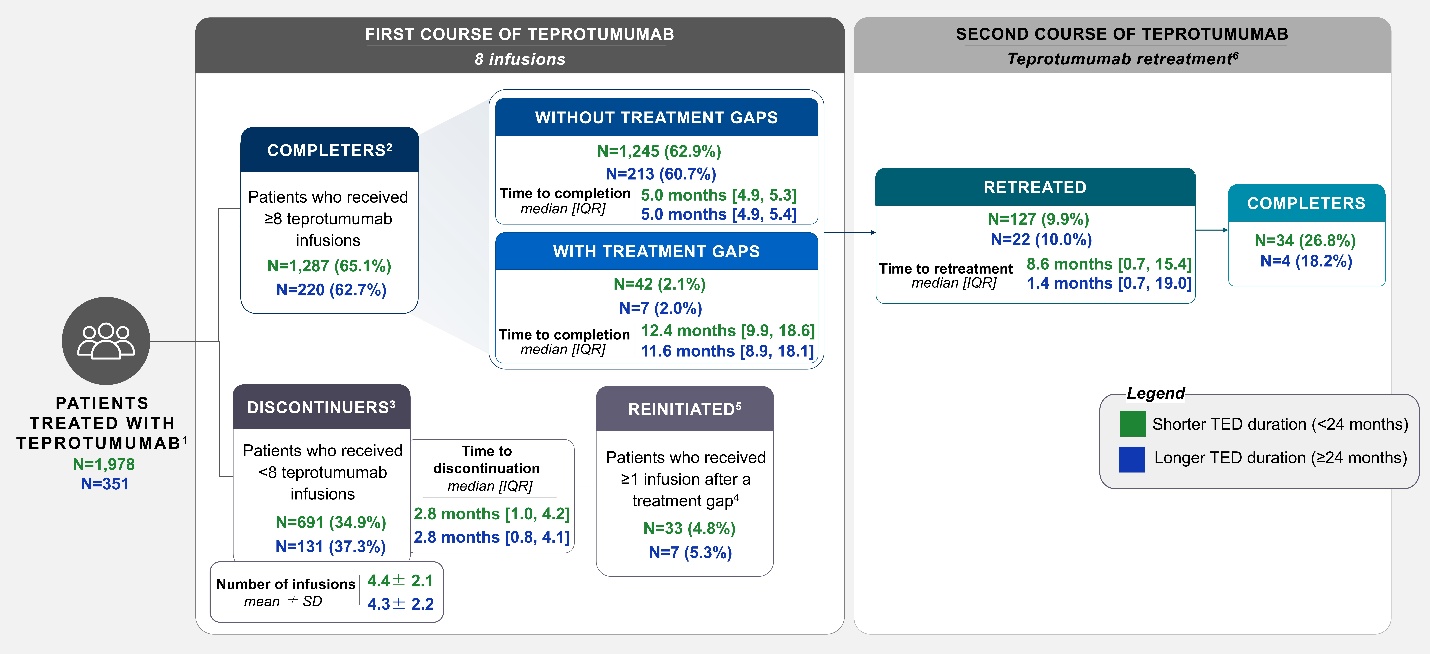
*

1Infusion patterns were reported based on all teprotumumab claims (which were required to be ≥10 days apart to be considered separate claims) observed between the index date and the end of follow-up. Patients who were potentially impacted by the COVID-19 supply chain disruption (i.e., patients who initiated teprotumumab in the second half of 2020 and discontinued in the first half of 2021; n=249) and patients with unknown disease duration at index (N=338) were excluded from the infusion pattern analyses. 2*First course* *completers* were defined as patients who received ≥8 teprotumumab infusions. 3*Discontinuers* were defined as patients who received <8 teprotumumab infusions. 4*Treatment gaps* were defined as a period of ≥90 days between two consecutive teprotumumab infusions. 5Among discontinuers, *reinitiation* was defined as receiving a subsequent infusion after a treatment gap (≥90 days), while still receiving <8 overall. 6Among completers, *retreatment* was defined as receiving at least one subsequent infusion after completion of a course (i.e., ≥9 infusions), with *second course completers* defined as patients who received ≥16 teprotumumab infusions.

IQR: interquartile range; SD, standard deviation; TED, thyroid eye disease.
